# Supplementary material for: Stabilizing metastable tetragonal HfO2 using a non-hydrolytic solution-phase route: ligand exchange as a means of controlling particle size
Source: Royal Society of Chemistry journal article supplement (doi:10.1039/c6sc01601d), 2016-01-01
Supplement: c6sc01601d1.pdf [file c6sc01601d1.pdf]

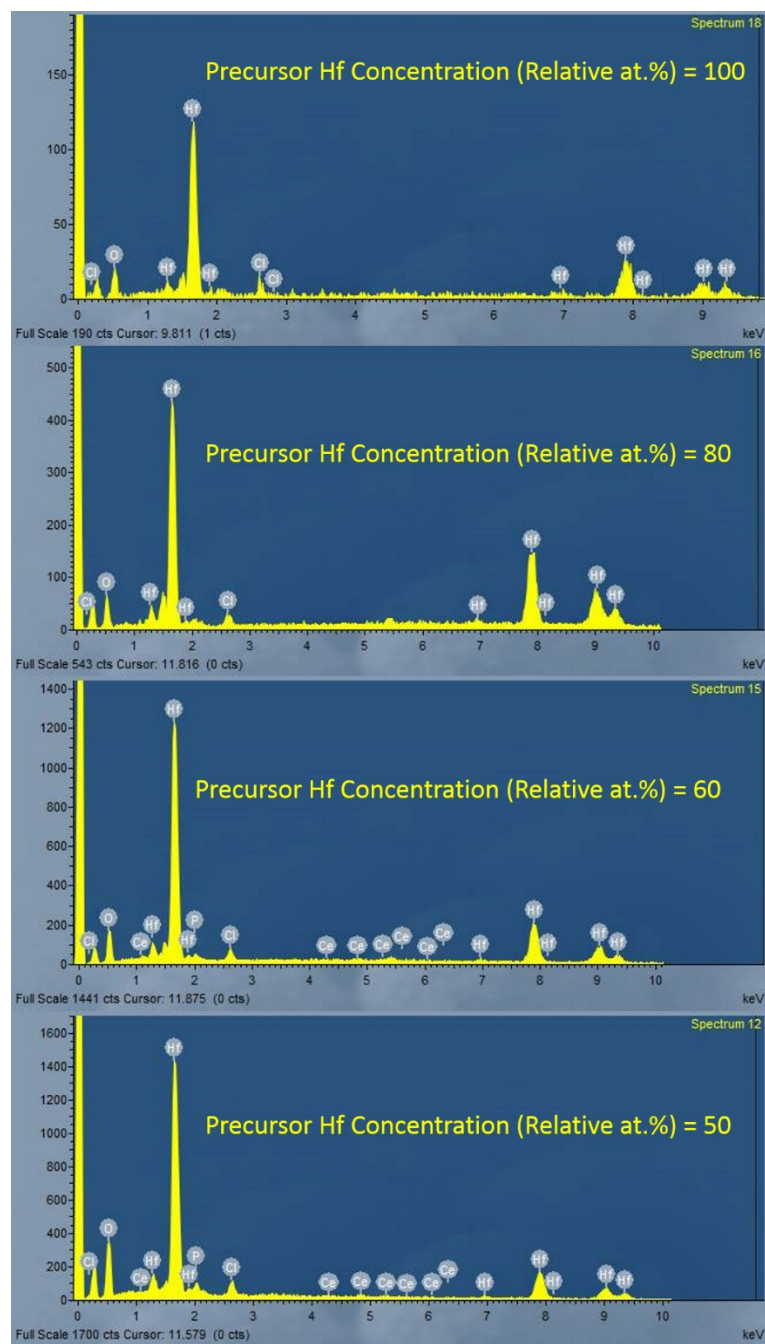

**Figure S1.** Energy dispersive X-ray spectroscopy (EDX) of pristine  $\text{HfO}_2$  and selected  $\text{Hf}_{1-x}\text{Ce}_x\text{O}_2$  nanocrystals. The detected concentrations of hafnium and cerium are listed in Table S1.

| Precursor Hf Concentration (Relative at.%) | Detected Hf Concentration by EDX (Relative at. %) | Detected Ce Concentration by EDX (Relative at. %) |
|--------------------------------------------|---------------------------------------------------|---------------------------------------------------|
| 100                                        | 100                                               | 0                                                 |
| 80                                         | 100                                               | Not Detected                                      |
| 60                                         | 99.75                                             | 0.25                                              |
| 50                                         | 96.13                                             | 3.87                                              |

**Table S1.** Detected concentrations of hafnium and cerium by EDX analysis based on integration of the data shown in Figure S1.

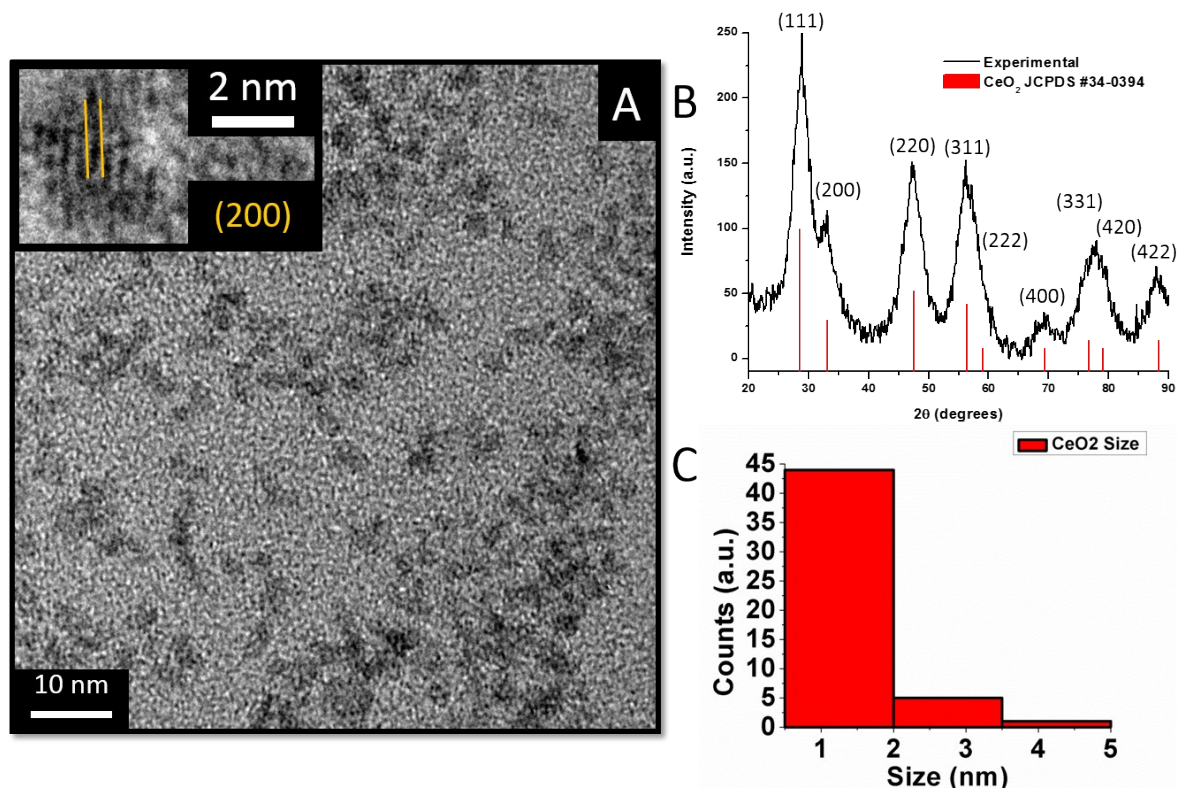

**Figure S2.** (A) Low-magnification transmission electron microscopy image of CeO<sub>2</sub> nanocrystals. The inset shows a HRTEM image indicating the separation between the (200) lattice planes of the cubic phase. (B) X-ray diffraction pattern of CeO<sub>2</sub> nanocrystals synthesized using 2 mmol of CeCl<sub>3</sub> and 2 mmol of Ce(O<sup>i</sup>Bu)<sub>4</sub>. Reflections of cubic CeO<sub>2</sub> are indicated in red (JCPDS # 34-0394). (C) Size distribution histogram indicating the size of the CeO<sub>2</sub> nanoparticles to be ca. 1.5 ± 0.5 nm.

| HfO <sub>2</sub> (Monoclinic) – JCPDS # 78-0050                                                                          |            |            |            |           |
|--------------------------------------------------------------------------------------------------------------------------|------------|------------|------------|-----------|
| atom                                                                                                                     | x          | y          | z          | occupancy |
| Hf1                                                                                                                      | 0.2755(2)  | 0.0397(1)  | 0.2080(2)  | 1.0       |
| O1                                                                                                                       | 0.0739(20) | 0.3318(17) | 0.3466(17) | 1.0       |
| O2                                                                                                                       | 0.4489(20) | 0.7582(16) | 0.4800(22) | 1.0       |
| Space Group = $P2_1/c$ , $a = 5.1170(1)$ , $b = 5.1754(2)$ , $c = 5.2915(2)$ $\alpha, \gamma = 90$ , $\beta = 99.216(2)$ |            |            |            |           |
| HfO <sub>2</sub> (Tetragonal) – From Ref. 40                                                                             |            |            |            |           |
| atom                                                                                                                     | x          | y          | Z          | occupancy |
| Hf1                                                                                                                      | 0.0        | 0.0        | 0.0        | 1.0       |
| Hf2                                                                                                                      | 0.5        | 0.5        | 0.5        | 1.0       |
| O1                                                                                                                       | 0.5        | 0.0        | 0.21282    | 1.0       |
| O2                                                                                                                       | 0.5        | 0.0        | -0.28718   | 1.0       |
| O3                                                                                                                       | 0.0        | 0.5        | 0.28718    | 1.0       |
| O4                                                                                                                       | 0.0        | 0.5        | -0.21282   | 1.0       |
| Space Group = $P4_2/nmc$ , $a, b = 3.560000$ , $c = 5.110000$ , $\alpha, \beta, \gamma = 90$                             |            |            |            |           |

**Table S2.** Unit cell parameters for the monoclinic and tetragonal phases of HfO<sub>2</sub>.

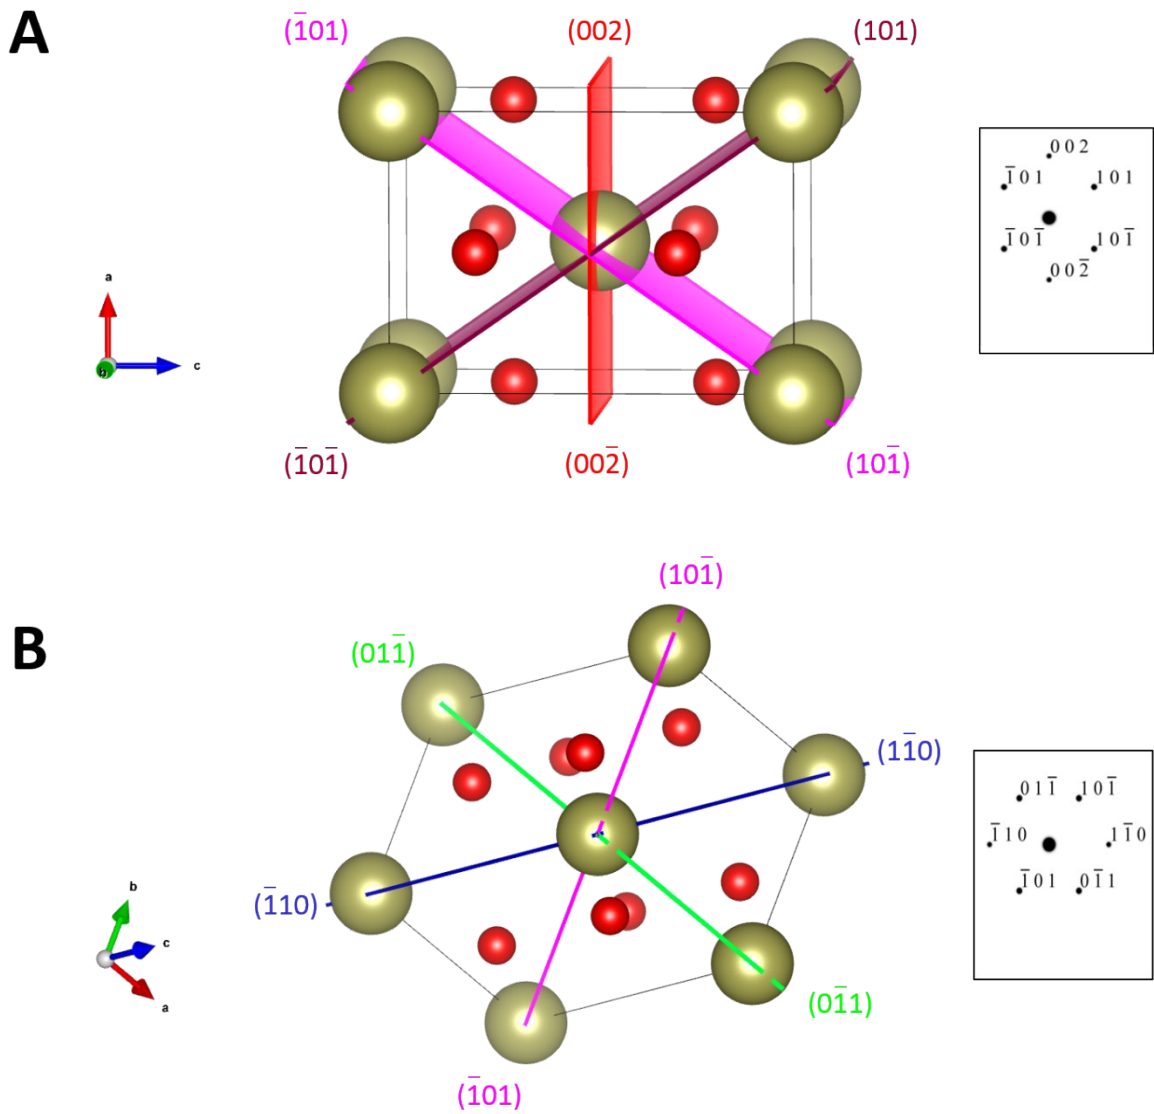

**Figure S3.** (A)  $\text{HfO}_2$  tetragonal unit cell depicting the corresponding lattice planes from Figure 3D. (B)  $\text{HfO}_2$  tetragonal unit cell depicting the corresponding lattice planes from Figure 3H. The unit cells were constructed using the lattice parameters given in Ref. 40.

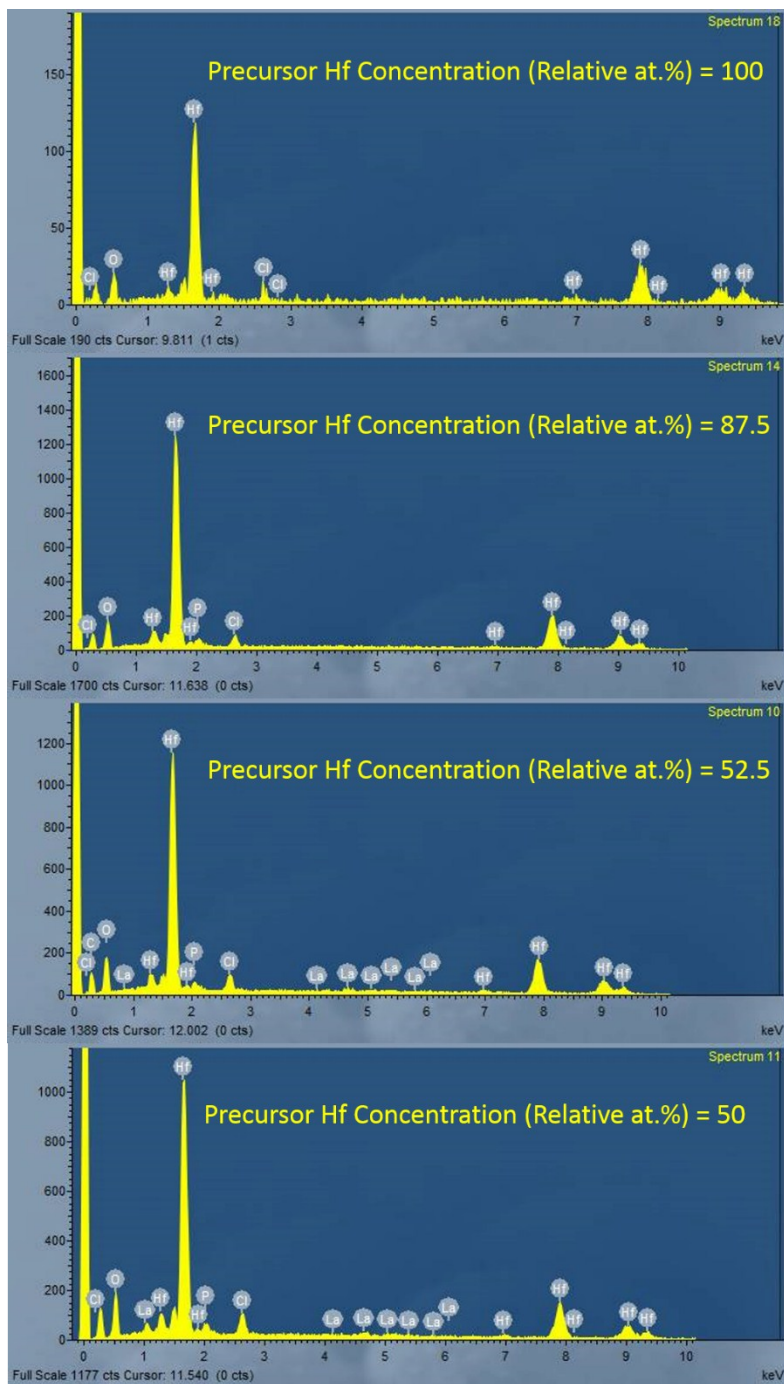

**Figure S4.** Energy dispersive X-ray spectroscopy (EDX) of pristine  $\text{HfO}_2$  and selected  $\text{Hf}_{1-x}\text{La}_x\text{O}_2$  nanocrystals. The detected concentrations of hafnium and lanthanum are listed in Table S3.

| Precursor Hf Concentration (Relative at.%) | Detected Hf Concentration by EDX (Relative at. %) | Detected La Concentration by EDX (Relative at. %) |
|--------------------------------------------|---------------------------------------------------|---------------------------------------------------|
| 100                                        | 100                                               | 0                                                 |
| 87.5                                       | 100                                               | Not Detected                                      |
| 52.5                                       | 96.81                                             | 3.19                                              |
| 50                                         | 95.99                                             | 4.01                                              |

**Table S3.** Detected concentrations of hafnium and lanthanum by EDX analysis integrated from the spectra depicted in Figure S4.

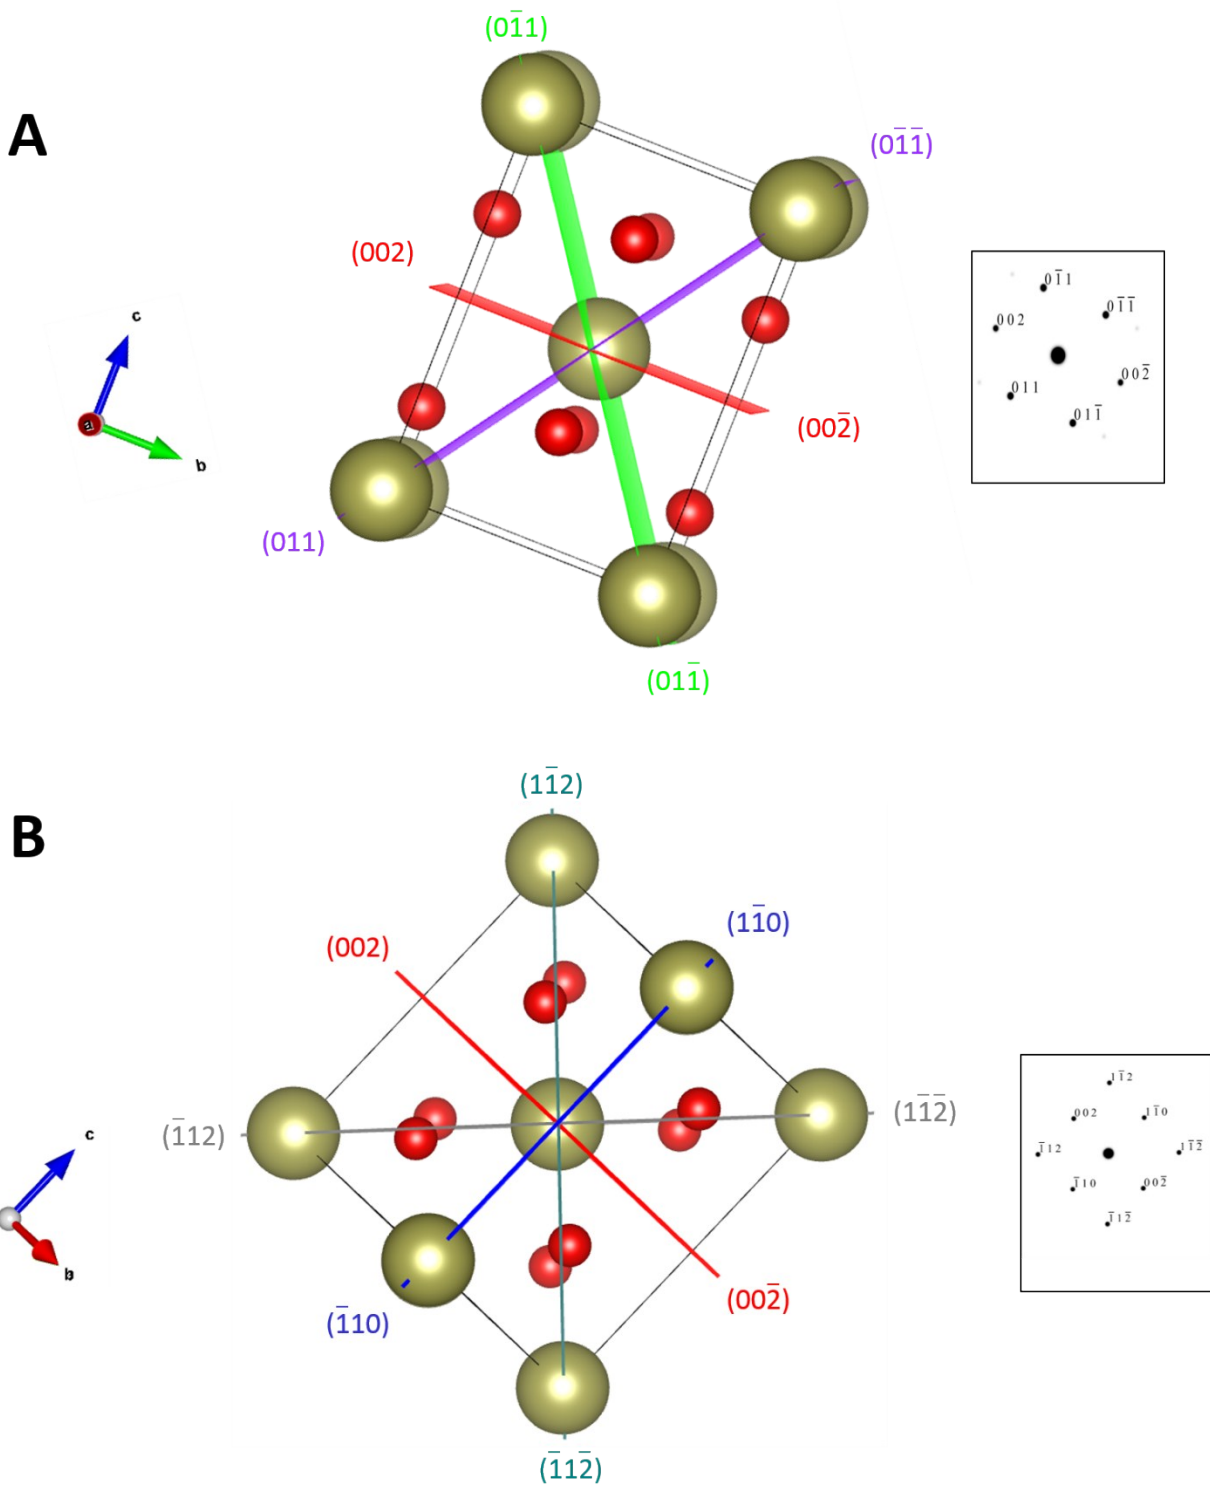

**Figure S5.** (A) HfO<sub>2</sub> tetragonal unit cell depicting the corresponding lattice planes from Figure 6D. (B) HfO<sub>2</sub> tetragonal unit cell depicting the corresponding lattice planes from Figure 6H. The unit cells are constructed using lattice parameters given in Ref. 40.
